# Supplementary material
Source: PubMed Central journal article supplement (PMC4249384)
Supplement: AAC.03622-14_zac011143395so1.pdf [file AAC.03622-14_zac011143395so1.pdf]

## Supplemental Material

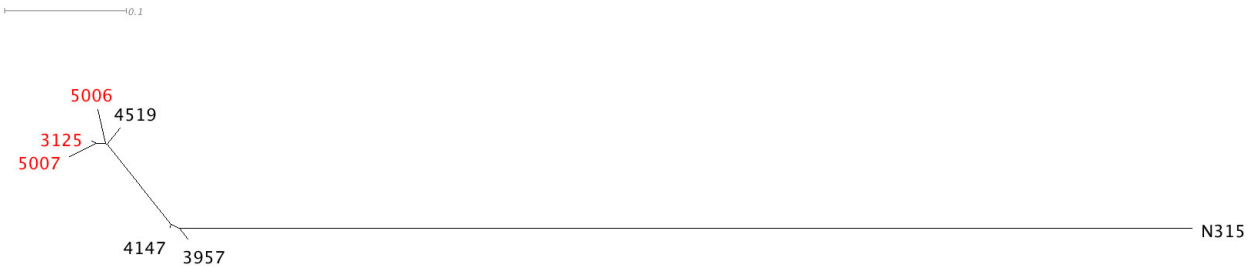

|              | N315 | TMHS-SA-5007 | TMHS-SA-5006 | TMHS-SA-4519 | TMHS-SA-4147 | TMHS-SA-3957 | TMHS-SA-3125 |
|--------------|------|--------------|--------------|--------------|--------------|--------------|--------------|
| TMHS-SA-3125 | 523  | 16           | 22           | 16           | 55           | 66           |              |
| TMHS-SA-3957 | 467  | 72           | 74           | 68           | 11           |              |              |
| TMHS-SA-4147 | 468  | 67           | 65           | 57           |              |              |              |
| TMHS-SA-4519 | 521  | 30           | 26           |              |              |              |              |
| TMHS-SA-5006 | 529  | 34           |              |              |              |              |              |
| TMHS-SA-5007 | 525  |              |              |              |              |              |              |
| N315         |      |              |              |              |              |              |              |

**Figure S1. Neighbor-joining tree showing estimates of the phylogenetic relationship between the patient isolates.** The tree shows the phylogenetic relationship between the genomes of the isolates studied. The genome of strain N315 was used as reference<sup>1</sup>. Ceftaroline-resistant isolates (MIC > 32 mg/L) are highlighted in red. The pairwise distances (i.e. the number of SNPs by which the strains differ) based on SNPs are shown in the bottom figure.

**Table S1. Sequences of primers used for *mecA* mutagenesis.**

| <b>Mutation</b>    | <b>Primer</b>                                                       |
|--------------------|---------------------------------------------------------------------|
| E239K              | 5'-CTAATGA AACAAAGAGTCGTAACCTATCC                                   |
| Y446N              | 5'-CGTTACAAGAAATGAAGTGGTAAATGG                                      |
| E447K              | 5'-CGTTACAAGATATAAAGTGGTAAATGG                                      |
| Y446N-E447K        | 5'-CGTTACAAGAAATAAAGTGGTAAATGG                                      |
| E239K-Y446N-E447K* | 5'-CGTTACAAGAAATAAAGTGGTAAATGG<br>5'-CTAATGA AACAAAGAGTCGTAACCTATCC |

\*To create the E239K-Y446N-E447K triple mutant, a two-step mutagenesis

procedure was performed and therefore two primers are listed.

**Table S2. SNPs identified in ceftaroline-resistant isolates**

| Genome Position | Gene   |             |          | Base |     | Codon |     | Amino Acid |     | Change |
|-----------------|--------|-------------|----------|------|-----|-------|-----|------------|-----|--------|
|                 | ID     | Name        | Position | Ref  | Sam | Ref   | Sam | Ref        | Sam |        |
| 3708            | SA0003 | --          | 39       | C    | T   | GAC   | GAT | D          | D   | S      |
| 45699           | SA0038 | <i>mecA</i> | 1339     | C    | T   | GAA   | AAA | E          | K   | NS     |
| 45702           | SA0038 | <i>mecA</i> | 1336     | A    | T   | TAT   | AAT | Y          | N   | NS     |
| 63952           | SA0057 | <i>ccrB</i> | 1074     | C    | T   | AAG   | AAA | K          | K   | S      |
| 83412           | SA0073 | --          | 320      | C    | T   | AGC   | AAC | S          | N   | NS     |
| 88746           | SA0078 | --          | 1055     | A    | G   | GAT   | GGT | D          | G   | NS     |
| 98144           | SA0088 | --          | 274      | A    | G   | ATT   | GTT | I          | V   | NS     |
| 166783          | SA0143 | <i>adhE</i> | 2327     | C    | T   | GCA   | GTA | A          | V   | NS     |
| 230901          | SA0195 | --          | 1384     | G    | A   | GAA   | AAA | E          | K   | NS     |
| 231999          | SA0197 | --          | 250      | T    | C   | TTT   | CTT | F          | L   | NS     |
| 254026          | SA0214 | <i>uhpT</i> | 759      | G    | A   | CTG   | CTA | L          | L   | S      |
| 271741          | SA0225 | --          | 371      | C    | T   | AGC   | AAC | S          | N   | NS     |
| 296739          | IG     |             |          |      |     |       |     |            |     |        |
| 342882          | SA0285 | --          | 48       | A    | G   | GTA   | GTG | V          | V   | S      |
| 354593          | IG     |             |          |      |     |       |     |            |     |        |
| 543212          | SA0470 | <i>hslO</i> | 8        | A    | G   | CAC   | CGC | H          | R   | NS     |
| 737892          | SA0643 | --          | 777      | T    | C   | CAT   | CAC | H          | H   | S      |
| 954599          | IG     |             |          |      |     |       |     |            |     |        |
| 994627          | SA0877 | <i>prfC</i> | 412      | A    | G   | ATT   | GTT | I          | V   | NS     |
| 1167831         | SA1030 | --          | 618      | T    | C   | CGT   | CGC | R          | R   | S      |
| 1252611         | SA1106 | <i>proS</i> | 701      | A    | G   | GAA   | GGA | E          | G   | NS     |
| 1309983         | IG     |             |          |      |     |       |     |            |     |        |
| 1363647         | SA1193 | <i>fmiC</i> | 36       | C    | T   | ATC   | ATT | I          | I   | S      |
| 1433445         | SA1260 | <i>thyA</i> | 97       | A    | G   | TCG   | CCG | S          | P   | NS     |

|         |        |              |      |   |   |     |     |   |   |    |  |
|---------|--------|--------------|------|---|---|-----|-----|---|---|----|--|
| 1433941 | IG     |              |      |   |   |     |     |   |   |    |  |
| 1487170 | SA1283 | <i>pbp2</i>  | 515  | C | T | GCA | GTA | A | V | NS |  |
| 1498423 | SA1291 | --           | 630  | G | A | CGC | CGT | R | R | S  |  |
| 1521664 | SA1313 | --           | 123  | T | C | GGA | GGG | G | G | S  |  |
| 1556732 | SA1346 | <i>bmfBB</i> | 63   | T | C | TTA | TTG | L | L | S  |  |
| 1585604 | SAS047 | <i>rpmG</i>  | 110  | G | T | TCA | TAA | S | * | NS |  |
| 1818069 | SA1579 | <i>leuS</i>  | 525  | A | G | TCT | TCC | S | S | S  |  |
| 1823243 | SA1584 | --           | 368  | C | T | GGA | GAA | G | E | NS |  |
| 1977307 | IG     |              |      |   |   |     |     |   |   |    |  |
| 2052862 | IG     |              |      |   |   |     |     |   |   |    |  |
| 2075143 | SA1838 | --           | 652  | G | A | GGA | AGA | G | R | NS |  |
| 2117791 | IG     |              |      |   |   |     |     |   |   |    |  |
| 2210418 | SA1959 | <i>glmS</i>  | 1471 | C | T | GCA | ACA | A | T | NS |  |
| 2236392 | SA1969 | --           | 1004 | T | A | GAT | GTT | D | V | NS |  |
| 2282754 | SA2010 | --           | 984  | G | A | GAC | GAT | D | D | S  |  |
| 2308472 | SA2048 | <i>rpsJ</i>  | 170  | T | A | AAG | ATG | K | M | NS |  |
| 2308476 | SA2048 | <i>rpsJ</i>  | 166  | G | A | CAT | TAT | H | Y | NS |  |
| 2469590 | SA2200 | --           | 515  | A | C | CTT | CGT | L | R | NS |  |
| 2484998 | SA2214 | <i>bioA</i>  | 1044 | T | C | TCA | TCG | S | S | S  |  |
| 2533830 | SA2256 | --           | 668  | T | C | GAC | GGC | D | G | NS |  |
| 2565384 | SA2287 | <i>sarH2</i> | 583  | T | C | TCA | CCA | S | P | NS |  |
| 2585465 | IG     |              |      |   |   |     |     |   |   |    |  |
| 2646228 | SA2354 | --           | 622  | C | T | GGG | AGG | G | R | NS |  |
| 2699250 | SA2408 | <i>culT</i>  | 1097 | A | G | TTA | TCA | L | S | NS |  |
| 2743211 | SA2439 | --           | 1145 | T | C | GAT | GGT | D | G | NS |  |
| 2748178 | SA2442 | --           | 1686 | A | G | AAT | AAC | N | N | S  |  |
| 2785787 | IG     |              |      |   |   |     |     |   |   |    |  |

This table shows the 51 SNPs identified in all ceftaroline resistant isolates (MIC > 32 mg/L) after filtering out the SNPs in common with susceptible isolate 3957. The genome of strain N315 was used as reference. Ref = Reference, Sam = Sample, NS = nonsynonymous, S = synonymous, IG = intergenic SNP, -- = name not annotated in reference genome. Nucleotide and amino acid codes are IUPAC standard.

**Table S3. Nonsynonymous single nucleotide polymorphisms in *mecA* (PBP2a) active site causing high level resistance to ceftaroline in *S. aureus*.**

| Genome Position | Gene   |             |          | Base |     | Codon |     | Amino Acid |     |
|-----------------|--------|-------------|----------|------|-----|-------|-----|------------|-----|
|                 | ID     | Name        | Position | Ref  | Sam | Ref   | Sam | Ref        | Sam |
| <b>45699</b>    | SA0038 | <i>mecA</i> | 1339     | C    | T   | GAA   | AAA | E          | K   |
| <b>45702</b>    | SA0038 | <i>mecA</i> | 1336     | A    | T   | TAT   | AAT | Y          | N   |

The table shows the two SNPs identified in all ceftaroline-resistant isolates (MIC >32 mg/L) hypothesized to be responsible for the observed resistance phenotype. These two SNPs were not identified by VAAL simultaneously in the susceptible isolates.

The genome of strain N315 was used as the reference. Ref = Reference, Sam = Sample. Nucleotide and amino acid codes are IUPAC standard.

**Table S4. Ceftaroline IC<sub>50</sub> values from competition binding assays**

| <b>PBP2a Strain</b> | <b>IC<sub>50</sub> (μM)</b> |
|---------------------|-----------------------------|
| WT                  | 1.5                         |
| E239K               | 0.6                         |
| Y446N               | > 500 <sup>a</sup>          |
| E447K               | 1.4                         |
| Y446N-E447K         | 49                          |
| E239K-Y446N-E447K   | 40                          |

The IC<sub>50</sub> value of ceftaroline for PBP2a WT and mutants was determined using a competition assay with bocillin (20).

<sup>a</sup>The Y446N mutant did not display inhibition at the highest concentration of ceftaroline that could be used in this assay. Thus, we have provided an estimate of its IC<sub>50</sub> value.

## **SUPPLEMENTAL REFERENCE**

1. Kuroda M, Ohta, T, Uchiyama I, et al. Whole genome sequencing of meticillin-resistant *Staphylococcus aureus*. Lancet 2001;357:1225-40.
